# Supplementary material for: HistoneHits: A database for histone mutations and their phenotypes
Source: HighWire-hosted journal article supplement (doi:10.1101/gr.083402.108), 2009-02-13
Supplement: Huang_Supp_Fig7.pdf [file Huang_Supp_Fig7.pdf]

# Histone Systematic Mutation Database

[home](#) [search](#) [submit](#) [analysis](#) [tutorial](#)

guest [sign out](#)

IntroductionInstitutionProteinStrainPlasmidAssay scoringAssay

Please select the number of assays you have done: 1

#1

Please select your phenotype

Please select your assay name

Assay readout

Assay format

Assay reporter

Assay direction

DNA Damage

Not in the list

Propose your new assay name

growth on plates

Benomyl

Please select

☒ Selection ☐ Counter Selection

Previous

Finish

|    | A                                                           | B                   | C                          | D                          | E |
|----|-------------------------------------------------------------|---------------------|----------------------------|----------------------------|---|
| 1  | <a href="#">Illustration to score your assay</a>            |                     |                            |                            |   |
| 2  |                                                             |                     |                            |                            |   |
| 3  | How are you going to enter your assay results?              |                     |                            | 5-point scale              |   |
| 4  |                                                             |                     |                            | 5-point scale              |   |
| 5  | What is your cut off point for -2?                          |                     |                            | Original value             |   |
| 6  | What is your cut off point for -1?                          |                     |                            |                            |   |
| 7  | What is your cut off point for 0?                           |                     |                            |                            |   |
| 8  | What is your cut off point for +1?                          |                     |                            |                            |   |
| 9  | What is your cut off points for +2?                         |                     |                            |                            |   |
| 10 |                                                             |                     |                            |                            |   |
| 11 | #Section for assay results                                  |                     |                            |                            |   |
| 12 | mutation_id                                                 | Slow growth_integer | Slow growth_real(optional) | Slow growth_char(optional) |   |
| 13 | #These are examples of how your entries should look like    |                     |                            |                            |   |
| 14 | K16A                                                        | 2                   | 1.9                        | white                      |   |
| 15 | R17A                                                        | 1                   | 1.3                        | light white                |   |
| 16 | H18A                                                        | 0                   | 0.1                        | normal                     |   |
| 17 | #End of example, please start your entires at the next line |                     |                            |                            |   |
| 18 |                                                             |                     |                            |                            |   |
| 19 |                                                             |                     |                            |                            |   |
| 20 |                                                             |                     |                            |                            |   |
| 21 |                                                             |                     |                            |                            |   |
| 22 |                                                             |                     |                            |                            |   |
| 23 |                                                             |                     |                            |                            |   |
| 24 |                                                             |                     |                            |                            |   |
