# Supplementary figures and images for: HistoneHits: A database for histone mutations and their phenotypes
Source: HighWire-hosted journal article supplement (doi:10.1101/gr.083402.108), 2009-02-13

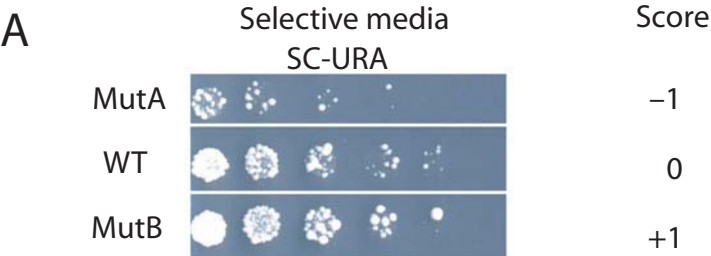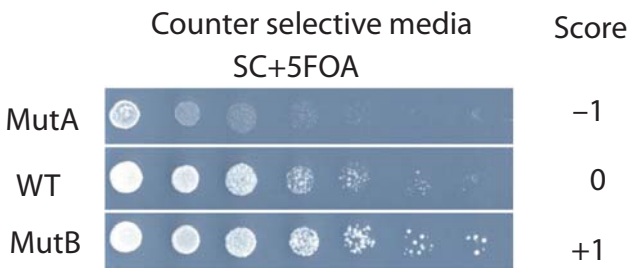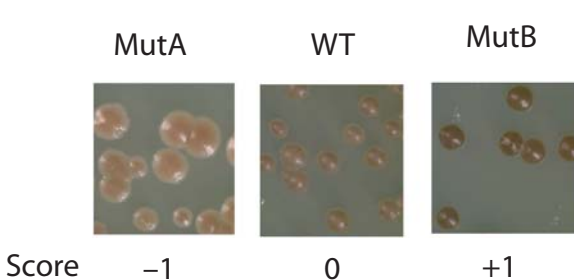

**C**

|                 | MutA | WT  | MutB |
|-----------------|------|-----|------|
| Enzymatic units | 0.9  | 2.5 | 6.1  |
| Score           | -1   | 0   | +1   |

Supplement: Huang_Supp_Fig1.pdf [file Huang_Supp_Fig1.pdf]

# H4 YEAST

31

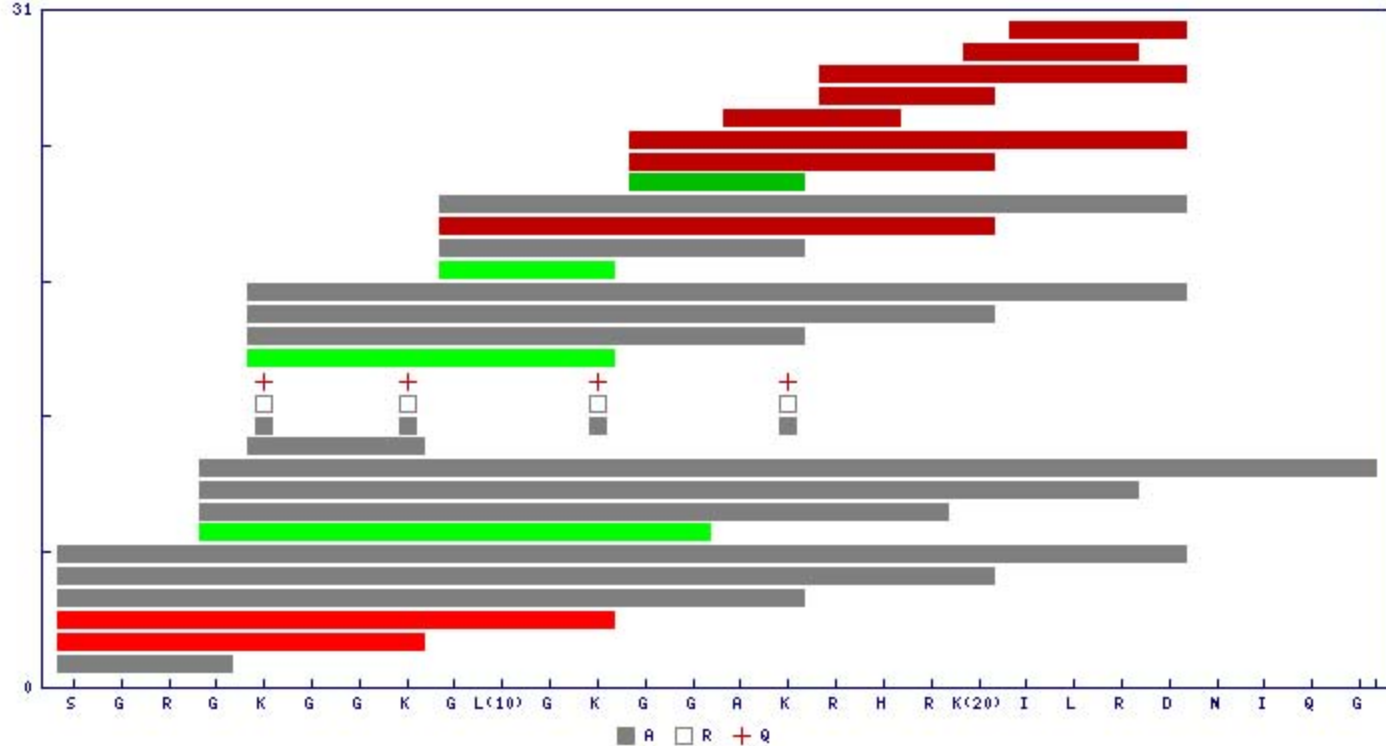

Supplement: Huang_Supp_Fig5.pdf [file Huang_Supp_Fig5.pdf]
